# Supplementary material for: Surface modification of gold by carbazole dendrimers for improved carbon dioxide electroreduction
Source: Royal Society of Chemistry journal article supplement (doi:10.1039/d3cc00350g), 2023-01-01
Supplement: d3cc00350g1.pdf [file d3cc00350g1.pdf]

## Supplementary Information

### Surface Modification of Gold by Carbazole Dendrimers for Improved Carbon Dioxide Electroreduction

*Sota Yoshida<sup>1</sup>, Masaki Sampei<sup>1</sup>, Naoto Todoroki<sup>1\*</sup>, Eri Hisamura<sup>2</sup>, Kohei Nakao<sup>2</sup>, Ken Albrecht<sup>2</sup> and Toshimasa Wadayama<sup>1</sup>*

<sup>1</sup>Graduate School of Environmental Studies, Tohoku University, 6-2-2 Aramaki-za-Aoba  
Aoba-ku, Sendai 980-8579, Japan

<sup>2</sup>Institute for Materials Chemistry and Engineering, Kyushu University, 6-1 Kasuga-koen,  
Fukuoka, 816-8580, Japan

E-mail: [naoto.todoroki.b1@tohoku.ac.jp](mailto:naoto.todoroki.b1@tohoku.ac.jp)

ORCID: <https://orcid.org/0000-0003-4811-6398>

## 1 • Experimental procedures

### *Au disk electrode*

A polycrystalline Au disk electrode ( $\phi = 5\text{mm}$ ) embedded in poly-ether-ether-ketone resin (AUE, BAS) was used as a working electrode for an H-type electrochemical cell. The surface of the Au electrode was polished using alumina pastes (0.3, and 0.05  $\mu\text{m}$ ) and then rinsed with acetone and ultrapure water before surface modification by the carbazole dendrimers (CDs).

### *Au-GDL electrode*

Au-GDL electrodes for a gas diffusion electrode (GDE) cell were prepared by radio frequency magnetron sputtering on a gas diffusion layer (GDL; MFK-A, Mitsubishi Chemical). The base pressure of a sputtering chamber was  $\sim 10^{-7}$  Pa. The one-inch-size sputtering gun (ASG-1, AVC) and Au target (99.99 %,  $\phi = 1$  inch,  $t = 1\text{mm}$ , PLASMATERIALS) were used for the sputtering. The sputtering rate was estimated using a quartz crystal microbalance (INFICON) set in the chamber.

### *Carbazole dendrimers (CDs)*

Carbazole (G1Cz) was purchased from Acros Organics and used after recrystallization from toluene. 9-Phenylcarbazole (G1Ph) was purchased from TCI and used without further purification. G3Cz was synthesized according to literature.<sup>1</sup> G3Ph were synthesized according to literature from corresponding carbazole dendrons.<sup>2</sup> The NMR spectra were obtained using JEOL JNM-ECA600 (600 MHz) or Bruker AVANCE III 400 (400MHz) with TMS as the internal standard. The MALDI TOF-MS data were obtained using a JEOL JMS-S3000 in the spiral positive ion mode with Dithranol as the matrix.

### *Surface modification of Au electrode by CDs*

The polished Au disk electrode surface was electrochemically cleaned by applying triangle wave potential cycles between 0.05-1.7 V vs. RHE. The cleaned electrode was rinsed by ultrapure water and dried in air. After that, 40  $\mu$ L toluene solution (99 %, Wako) with 0.1 mM in concentration of each CD was drop-casted on the electrode and dried in air for 30 min. This process was repeated twice to prepare the modified-Au electrodes. Similar dropping and drying procedures by CDs are adopted also for Au-GDL electrode.

### *Electrochemical CO<sub>2</sub> reduction by using H-type cell configuration*

A potentiogalvanostat (SP-50eZ, Biologic) equipped with an impedance module was used for the electrochemical measurements. A glass-made H-type cell, Pt-wire, and reversible hydrogen electrode were employed as the electrochemical (EC) cell, counter electrode, and reference electrode, respectively. The anode and cathode compartments (both 50 mL) were separated using a Nafion membrane (NR212; Chemours). Initial electrochemical surface cleaning of the Au disk electrode and the reduction experiments were conducted in a 0.1 M KHCO<sub>3</sub> solution at 20 °C. The 0.1 M KHCO<sub>3</sub> solution was prepared from a KHCO<sub>3</sub> powder (>99 %, ACS grade, Merck) and ultrapure water (Milli-Q).

### *Electrochemical measurement procedures for H-type Cell*

The CO<sub>2</sub> electrochemical reduction was performed in CO<sub>2</sub>-saturated 0.1 M KHCO<sub>3</sub> solution (pH = 6.8) for the Au disk electrode. The CO<sub>2</sub> gas (>99.995 %) was flow into electrolyte during the electrolysis with a constant flow rate of 30 sccm (standard cubic centimeter per minute; S48-32, HORIBA STEC). The constant potential electrolysis was performed at -0.3, -0.4, -0.5, -0.6 vs. RHE for 10 min, and generated gaseous products of CO<sub>2</sub> reduction were analyzed by gas chromatography with thermal

conductivity detector, flame ionization detector and methanizer (GC-2014, Shimadzu). Liquidus products were analyzed by nuclear magnetic resonance (NMR) spectroscopy (JEOL, ECZL-600). Because no liquidus reduction products of CO<sub>2</sub> were detected for all the samples at all the applied potentials by NMR, only the faradaic efficiency of gaseous product of CO was discussed in this study.

The potential-dependent hydrogen evolution reaction (HER) behaviors were discussed by linear sweep voltammetry at a scan rate of 5 mV s<sup>-1</sup> in Ar-purged 0.1 M phosphate buffer solution with pH = 6.8 (without CO<sub>2</sub> saturation), which the same value of CO<sub>2</sub>-saturated 0.1 M KHCO<sub>3</sub> solution. The solution was prepared from NaH<sub>2</sub>PO<sub>4</sub> · 2H<sub>2</sub>O (>99 %, Fujifilm), Na<sub>2</sub>HPO<sub>4</sub> · 12H<sub>2</sub>O (>98 %, Fujifilm) and Milli-Q water.

#### *Underpotential deposition of Pb*

Pb-underpotential deposition experiment was performed for estimating active surface areas for each crystal facets of polycrystalline Au electrode. A polymethyl pentene (PMP) cell, Pt-wire, and Hg/HgO (0.1 M NaOH) were used as a Pb-UPD electrochemical cell, counter electrode, and reference electrode, respectively. Cyclic voltammetry was conducted between -0.75 and -0.15 V vs. Hg/HgO in Ar-purged 1 mM Pb(OAc)<sub>2</sub> + 0.1 M NaOH solution (pH = 13). The solution was prepared from

Pb(OAc)<sub>2</sub> · 3H<sub>2</sub>O (Fujifilm, >99.9 %), NaOH (Fujifilm, >98 %) and Milli-Q water. The working electrode potential vs. Hg/HgO was converted to RHE standard using the following equation.

$$E_{RHE} (V) = E_{Hg/HgO} + 0.926 + 0.05916pH$$

#### *X-ray photoelectron spectroscopy (XPS)*

Chemical bonding states of the CD-modified Au electrode surface was discussed by using X-ray photoelectron spectroscopy (XPS; Theta Probe, Thermo Fisher Scientific) with a monochromatized Al X-ray source (1487 eV).

#### *High current density CO<sub>2</sub> electrochemical reduction by using GDE cell*

A flow-type gas diffusion electrode (GDE) cell and solution circulation system<sup>3</sup> was constructed in our laboratory and used for a high current density electrolysis ( ~100 mA cm<sup>-2</sup> ). Each chamber (Fig. 4(a)) in the main manuscript of cathode, anode, and CO<sub>2</sub>-flow was made of polytetrafluoroethylene (PTFE). Pt-wire, and reversible hydrogen electrode were used as the counter and reference electrode, respectively. The cathode and anode chambers were separated using a Nafion membrane (NR212; Chemours). The 1 M KHCO<sub>3</sub> solution at 20 °C was prepared from a KHCO<sub>3</sub> powder (>99 %, ACS grade,

Merck) and ultrapure water (Milli-Q), and was used for catholyte and anolyte. The CO<sub>2</sub>-flow rate was set to be 20 sccm by the mass flow controller (S48-32, HORIBA STEC). The applied potentials were not iR-corrected.

## 2 · Supplemental results

### *CVs of Pb-UPD and HER activity for G1Cz- and G3Cz-modified Au disk electrodes*

Cyclic voltammograms of the Pb-UPD experiments for G1Cz- and G3Cz-modified Au disk electrodes are presented in Figure S1(a). Estimated Pb-stripping charges from (a) are summarized in (b). The estimated charges of G1Cz-, G3Cz-modified Au disk electrodes show almost the same tendency to corresponding G1Ph, G3Ph-modified Au ones (Fig. 3 in manuscript), irrespective of the introduced functional groups (-NH and -phenyl) to the corresponding CD backbones. Figure S1(c) shows linear sweep voltammograms of G1Cz- and G3Cz-modified Au electrodes. HER current density of G1Cz-Au disk electrode slightly increased, while G3Cz-modified Au decreased compared with non-modified one.



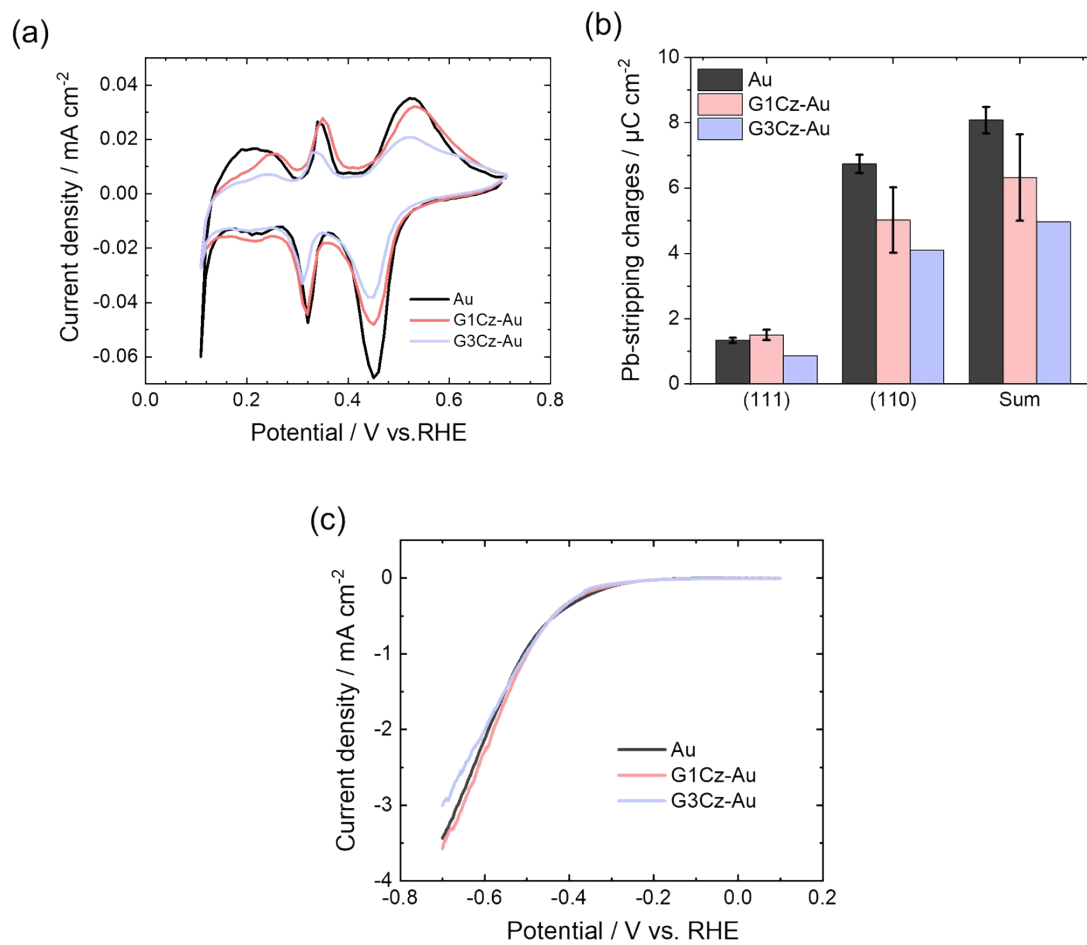

Figure S1. (a) Cyclic voltammograms collected in an Ar-purged 1 mM Pb(OAc)<sub>2</sub> + 0.1 M NaOH solution for Pb underpotential deposition. (b) Pb-stripping charges estimated from (a). (c) Linear-sweep voltammograms recorded in Ar-purged 0.1 M PBS electrolyte with a pH of 6.8 for evaluating the HER property.

*NMR and MALDI-TOF-MS spectra of G3Ph and CzG3*

Figure S2-S5 shows NMR and MALDI-TOF-MS spectra of G3Ph and CzG3.

No impurities could be detected for the synthesized G3Ph and CzG3 used in this study.

(a)

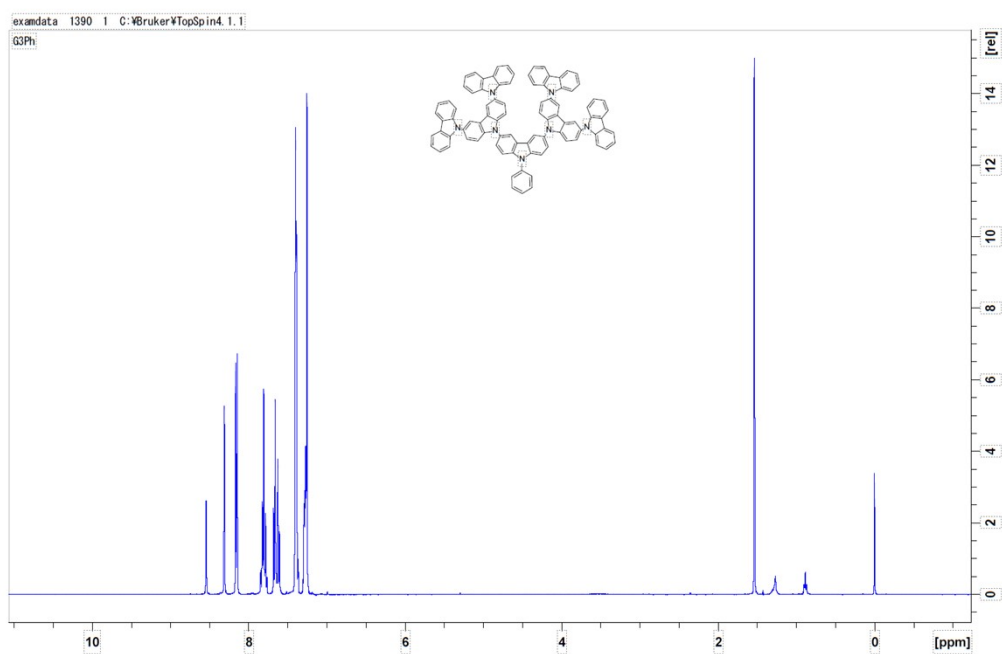

(b)

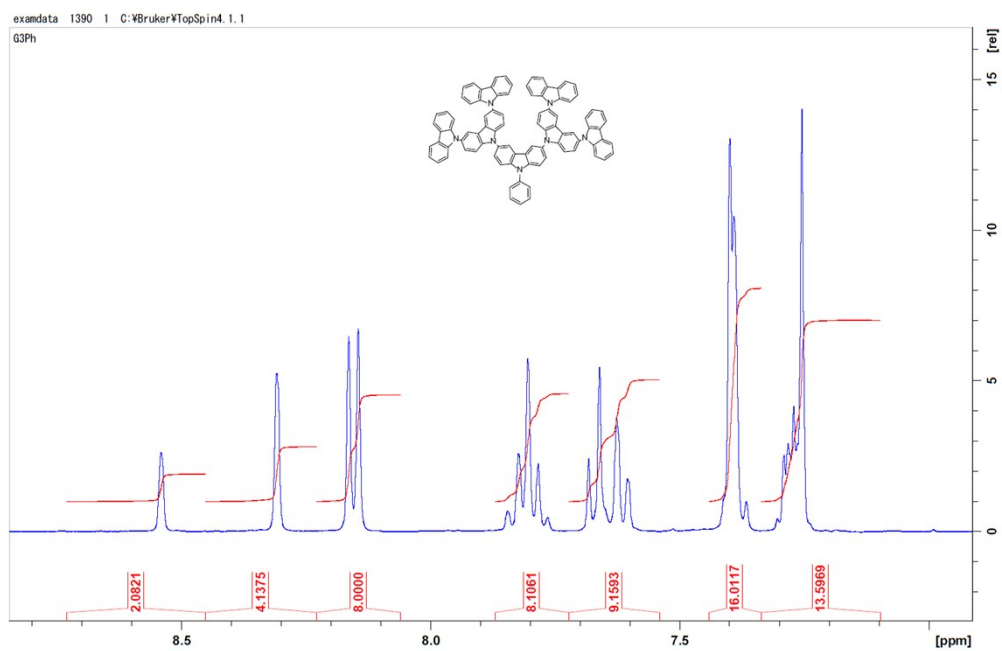

Figure S2.  $^1\text{H}$  NMR spectrum of G3Ph in chloroform-d: (a) overall, (b) enlarged spectrum.

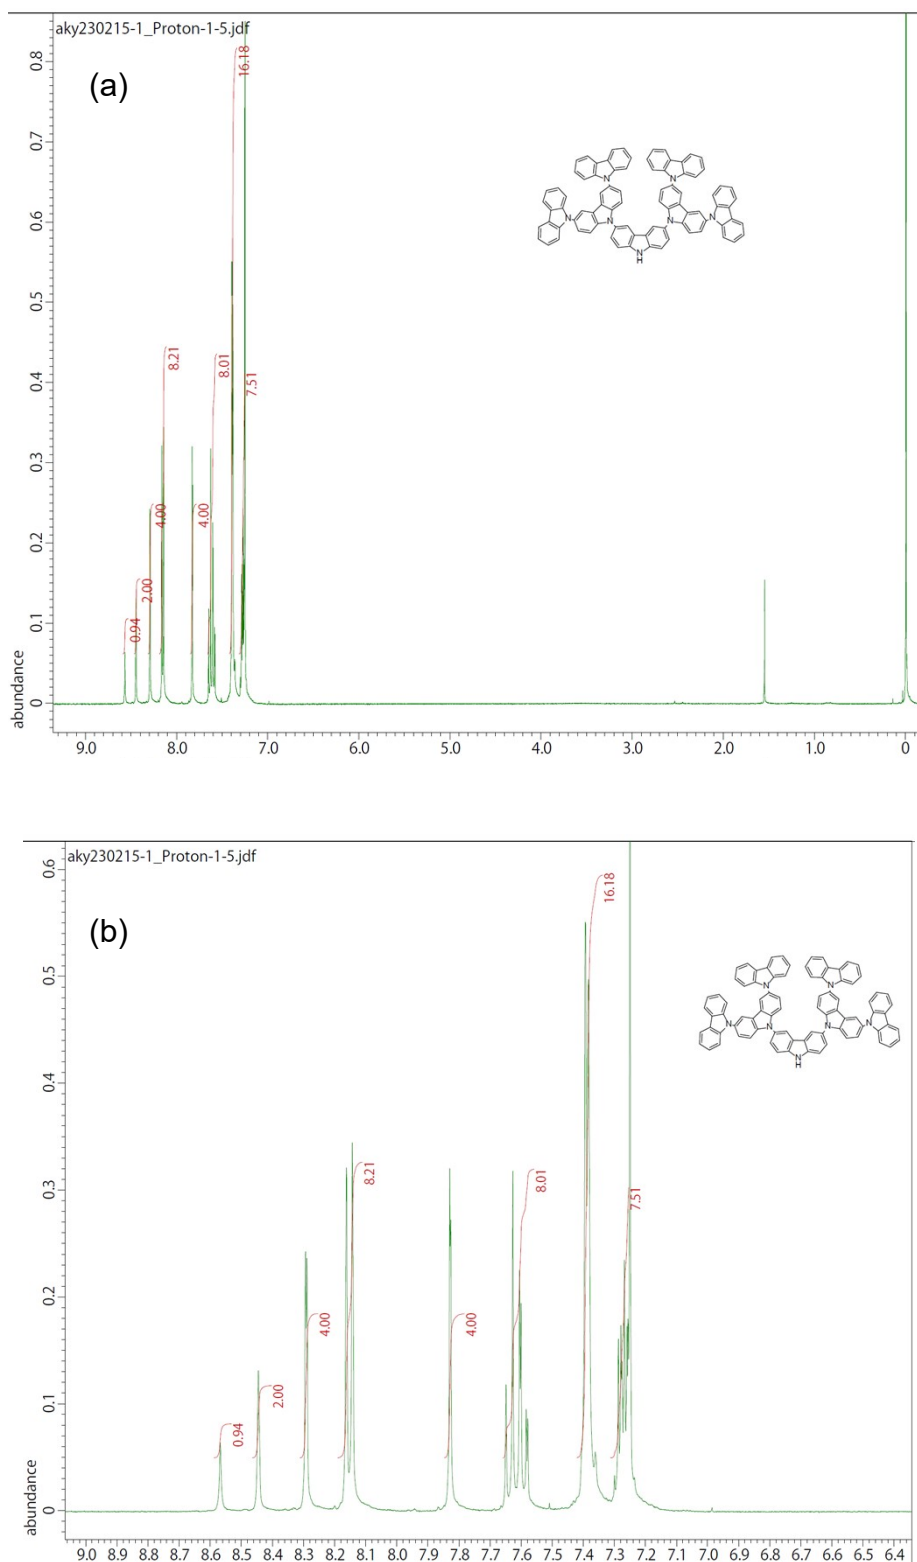

Figure S3.  $^1\text{H}$  NMR spectrum of G3Cz in chloroform- $d$ : (a) overall, (b) enlarged spectrum.

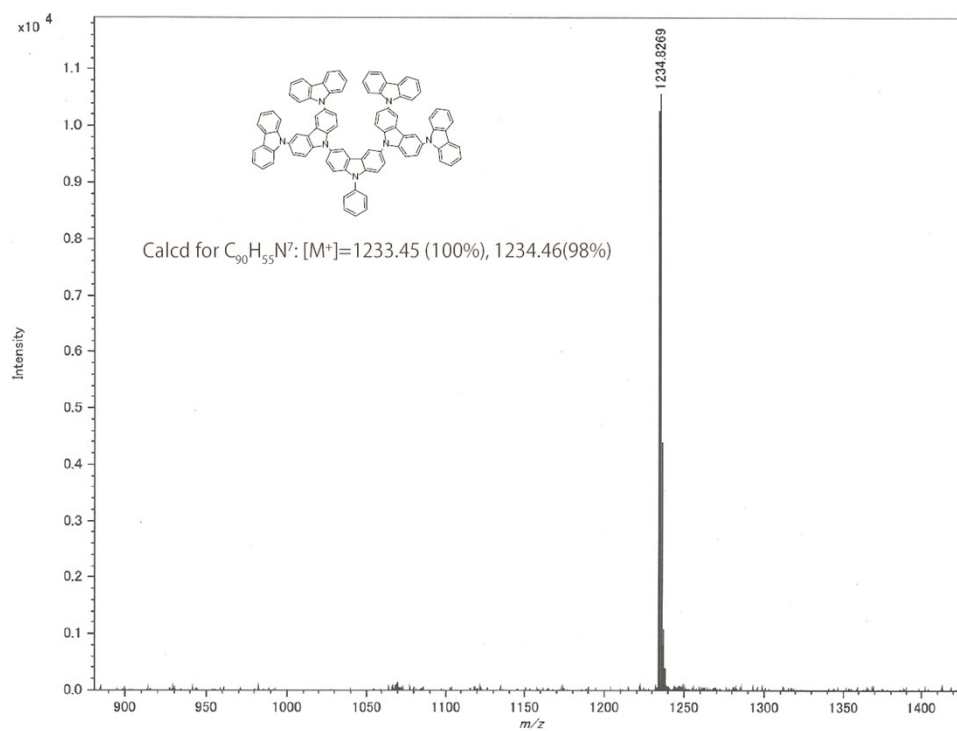

Figure S4. MALDI-TOF-MS spectra of G3Ph.

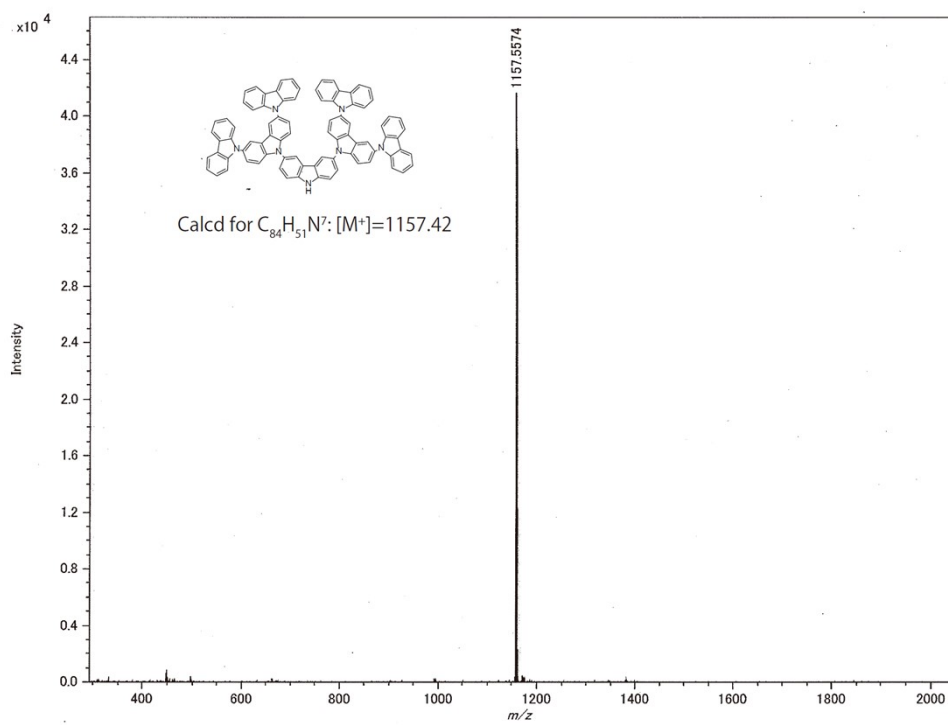

Figure S5. MALDI-TOF-MS spectra of G3Cz.

### 3. Comparison of the $FE_{CO}$ and $j_{CO}$ with previous studies

Tabel S1. Summary of  $FE_{CO}$  and  $j_{CO}$  values for molecular-modified Au surfaces reported to date.

| Sample                | Surface modifiers            | Electrolyte     | $FE_{CO}$  |                   | Partial current density for CO |                   | Ref.       |
|-----------------------|------------------------------|-----------------|------------|-------------------|--------------------------------|-------------------|------------|
|                       |                              |                 | Max. value | Potential vs. RHE | Max. value                     | Potential vs. RHE |            |
| Au nanorod            | 5-mercapto-1-methyltetrazole | 0.5 M $KHCO_3$  | 98         | -0.6              | 14.5                           | -0.9              | 4          |
| Au nanofibers         | polyaniline                  | 0.1 M $NaHCO_3$ | 70         | -0.7              | 6.9                            | -0.9              | 5          |
| Au-NPs/N-doped carbon | L-cysteine                   | 0.1 M $KHCO_3$  | 95         | -0.75             | 27                             | -0.95             | 6          |
| Au-NPs/C              | PTFE                         | 0.1 M $KHCO_3$  | 95         | -0.7              | 8.4                            | -1                | 7          |
| Au-NPs/rGO            | Oleylamine                   | 0.1 M $KHCO_3$  | 75         | -0.7              | 7.4                            | -0.8              | 8          |
| Au-NPs/C              | PVA                          | 0.5 M $KHCO_3$  | 97         | -0.58             | 98.6                           | -0.77             | 9          |
| Au-NPs/C              | Porphyrin ligand P1          | 0.1 M $KHCO_3$  | 93         | -0.45             | 7.9                            | -0.8              | 10         |
| Au disk               | G1Ph                         | 0.1 M $KHCO_3$  | 98         | -0.4              | 2.8                            | -0.6              | This study |
| 100nm-Au/GDL          |                              | 1 M $KHCO_3$    | 99         | -0.7              | 98                             | -1.7              |            |
| Au disk               | non-modified                 | 0.1 M $KHCO_3$  | 93         | -0.6              | 2.4                            | -0.6              |            |
| 100nm-Au/GDL          |                              | 1 M $KHCO_3$    | 89         | -0.5              | 87                             | -1.7              |            |

## References

1. K. Albrecht, K. Matsuoka, K. Fujita and K. Yamamoto, *Angew. Chem. Int. Ed.*, 2015, **54**, 5677-5682.
2. K. Albrecht and K. Yamamoto, *J. Am. Chem. Soc.*, 2009, **131**, 2244-2251.
3. M. Sassenburg, R. de Rooij, N. T. Nesbitt, R. Kas, S. Chandrashekar, N. J. Firet, K. Yang, K. Liu, M. A. Blommaert, M. Kolen, D. Ripepi, W. A. Smith and T. Burdyny, *ACS Appl Energy Mater*, 2022, **5**, 5983-5994.
4. J. Wang, J. Yu, M. Sun, L. Liao, Q. Zhang, L. Zhai, X. Zhou, L. Li, G. Wang, F. Meng, D. Shen, Z. Li, H. Bao, Y. Wang, J. Zhou, Y. Chen, W. Niu, B. Huang, L. Gu, C. S. Lee and Z. Fan, *Small*, 2022, **18**, e2106766.
5. T.-H. Wang, C.-Y. Lin, Y.-C. Huang and C.-Y. Li, *Electrochim. Acta*, 2023, **437**, 141500.
6. M. Tan, X. Han, S. Ru, C. Zhang, Z. Ji, Z. Shi, G. Qiao, Y. Wang, R. Cui, Q. Luo, J. Jiao, Y. Li and T. Lu, *Nano Research*, 2022, DOI: 10.1007/s12274-022-4878-3.
7. J. H. Lee, S. Kattel, Z. Xie, B. M. Tackett, J. Wang, C.-J. Liu and J. G. Chen, *Advanced Functional Materials*, 2018, **28**, 1804762.
8. Y. Zhao, C. Wang, Y. Liu, D. R. MacFarlane and G. G. Wallace, *Adv. Energy Mater.*, 2018, **8**, 1801400.
9. L. Ma, W. Hu, Q. Pan, L. Zou, Z. Zou, K. Wen and H. Yang, *Journal of CO2 Utilization*, 2019, **34**, 108-114.
10. Z. Cao, S. B. Zacate, X. Sun, J. Liu, E. M. Hale, W. P. Carson, S. B. Tyndall, J. Xu, X. Liu, X. Liu, C. Song, J.-h. Luo, M.-J. Cheng, X. Wen and W. Liu, *Angew. Chem. Int. Ed.*, 2018, **57**, 12675-12679.
